# Supplementary material
Source: Copernicus journal article supplement (doi:10.5194/essd-18-3609-2026)
Supplement: Supplementary file [file essd-18-3609-2026-supplement-title-page.pdf › essd-18-3609-2026-supplement-title-page.pdf]

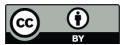

## *Supplement of*

# **Gulf of St. Lawrence and Estuary Dataset (GOSLED): a 20-year compilation of quality-controlled biogeochemical observations (2003–2023)**

**William A. Nesbitt et al.**

*Correspondence to:* William A. Nesbitt ([william.nesbitt@dal.ca](mailto:william.nesbitt@dal.ca))

- [essd-18-3609-2026-supplement-title-page.pdf](#)
- [Final Submission - Supplemental Material.pdf](#)
- [GOSLED - CSV Supplemental.csv](#)

The copyright of individual parts of the supplement might differ from the article licence.
